# Supplementary material for: Maternal Obesity as a Risk Factor for Caesarean Delivery in Sub-Saharan Africa: A Systematic Review
Source: MDPI journal article supplement (doi:10.3390/life12060906), 2022-06-17
Supplement: s1 [file s1]

## Supplementary Material

**Supplementary Table S1:** Full-text articles excluded with reasons

| Excluded studies                | Reason for exclusion                                                          |
|---------------------------------|-------------------------------------------------------------------------------|
| Olayemi et al., 2002 [31]       | BMI was not measured                                                          |
| Puotege et al., 2020 [32]       | The exposure of the study was weight gain during pregnancy instead of obesity |
| Akinola et al., 2014 [33]       | BMI was not measured                                                          |
| Edomwonyi & Osaigbovo 2006 [34] | Outcome was obesity incidence not caesarean delivery                          |
| Efiong 1975 [35]                | BMI was not measured                                                          |
| Moraes et al., [36]             | Maternal age was the exposure compared                                        |
| Mpotora et al., 2021 [37]       | BMI was not measured                                                          |

**Supplementary Table S2:** Sample of data extraction form

| <b>General information</b>                             | <b>Details</b>                                                                                                       |
|--------------------------------------------------------|----------------------------------------------------------------------------------------------------------------------|
| Author, Year                                           | Adesina et al, 2011                                                                                                  |
| Article title                                          | Pregnancy outcome of the obese in Ilorin                                                                             |
| Country of origin                                      | Nigeria                                                                                                              |
| <b>Study characteristics</b>                           |                                                                                                                      |
| Study design                                           | Case- control                                                                                                        |
| Study inclusion and exclusion criteria                 | Gestational age less than 32 weeks                                                                                   |
| Recruitment procedures used                            | Booked pregnant women attending the antenatal clinic of the University of Ilorin Teaching Hospital                   |
| Unit of allocation                                     | Participant                                                                                                          |
| <b>Participant characteristics</b>                     |                                                                                                                      |
| Age                                                    | 20 +                                                                                                                 |
| Disease characteristics                                | BMI greater than 30kg/m <sup>2</sup>                                                                                 |
| Number of participants enrolled                        | 236                                                                                                                  |
| Number of withdrawals, exclusions, lost to follow-up   | N/A                                                                                                                  |
| Number of participants in each characteristic category | Obese: 80    Non-obese: 156                                                                                          |
| <b>Exposure and setting</b>                            |                                                                                                                      |
| Setting in which the intervention is delivered         | Hospital antenatal care                                                                                              |
| Description of the exposure and control                | Exposure: obese (BMI greater than 30 kg/m <sup>2</sup> )<br>Control: not obese (BMI less than 30 kg/m <sup>2</sup> ) |
| <b>Outcome data/results</b>                            |                                                                                                                      |
| Unit of assessment/analysis                            | Frequency of caesarean delivery as percentage                                                                        |
| Statistical techniques used                            | Chi squared test ( $\chi^2 = 9.87$ , P = 0.00)                                                                       |
| <b>Summary outcome data</b>                            |                                                                                                                      |
| Number of caesarean deliveries/ number of obese        | 63/156                                                                                                               |
| Type of analysis used in study                         | Odds ratio, confidence intervals                                                                                     |
| <b>Results of study analysis</b>                       | 1.91 (0.99-3.66)                                                                                                     |

**Supplementary Table S3:** Sample of quality assessment checklist

Critical Appraisal Skills Programme (CASP) Checklist for Adesina et al., [39]

| Question                                                                                                       | Answer     | Comments                                                                                                       |
|----------------------------------------------------------------------------------------------------------------|------------|----------------------------------------------------------------------------------------------------------------|
| 1. Did the study address a clearly focused issue?                                                              | Yes        | Study focused on the effects of obesity on obstetric performance.                                              |
| 2. Did the authors use an appropriate method to answer their question?                                         | Yes        | A case control study design is an appropriate method.                                                          |
| 3. Were the participants recruited in an acceptable way?                                                       | Yes        | Participants were selected by BMI and gestational age. Cases were matched for age, parity and gestational age. |
| 4. Was the exposure accurately measured to minimise bias?                                                      | Yes        | Obesity was measured by BMI.                                                                                   |
| 5. Was the outcome accurately measured to minimise bias?                                                       | Yes        | The outcome was occurrence of caesarean delivery.                                                              |
| 6. Have the authors taken account of the potential confounding factors in the design and/or in their analysis? | Yes        | Cases and controls were matched.                                                                               |
| 7. How large was the exposure effect?                                                                          | Can't Tell | Study used chi square to determine if there was an association.                                                |
| 8. How precise was the estimate of the exposure effect?                                                        | Can't Tell | P-value was used.                                                                                              |
| 9. Do you believe the results?                                                                                 | Yes        | Obese women had increased risk of caesarean delivery.                                                          |
| 10. Can the results be applied to the local population?                                                        | Can't Tell |                                                                                                                |
| 11. Do the results of this study fit with other available evidence?                                            | Yes        | The author cited comparable findings.                                                                          |
